# Supplementary material
Source: publisher figshare collection journal article supplement (https://tandf.figshare.com/ndownloader/files/14480144)

**Supplemental Figure 1. Schematic diagram of the experimental design. (A)** Assessment of platelet function under static conditions. **(B)** Assessment of platelet activity under high shear stress. NaCit: sodium citrate; WB: whole blood; ab: antibody; IgG: immunoglobulin G; ACD: acid citrate dextrose; PRP: platelet-rich plasma; GFP: gel-filtered platelets; CPD: citrate phosphate dextrose.
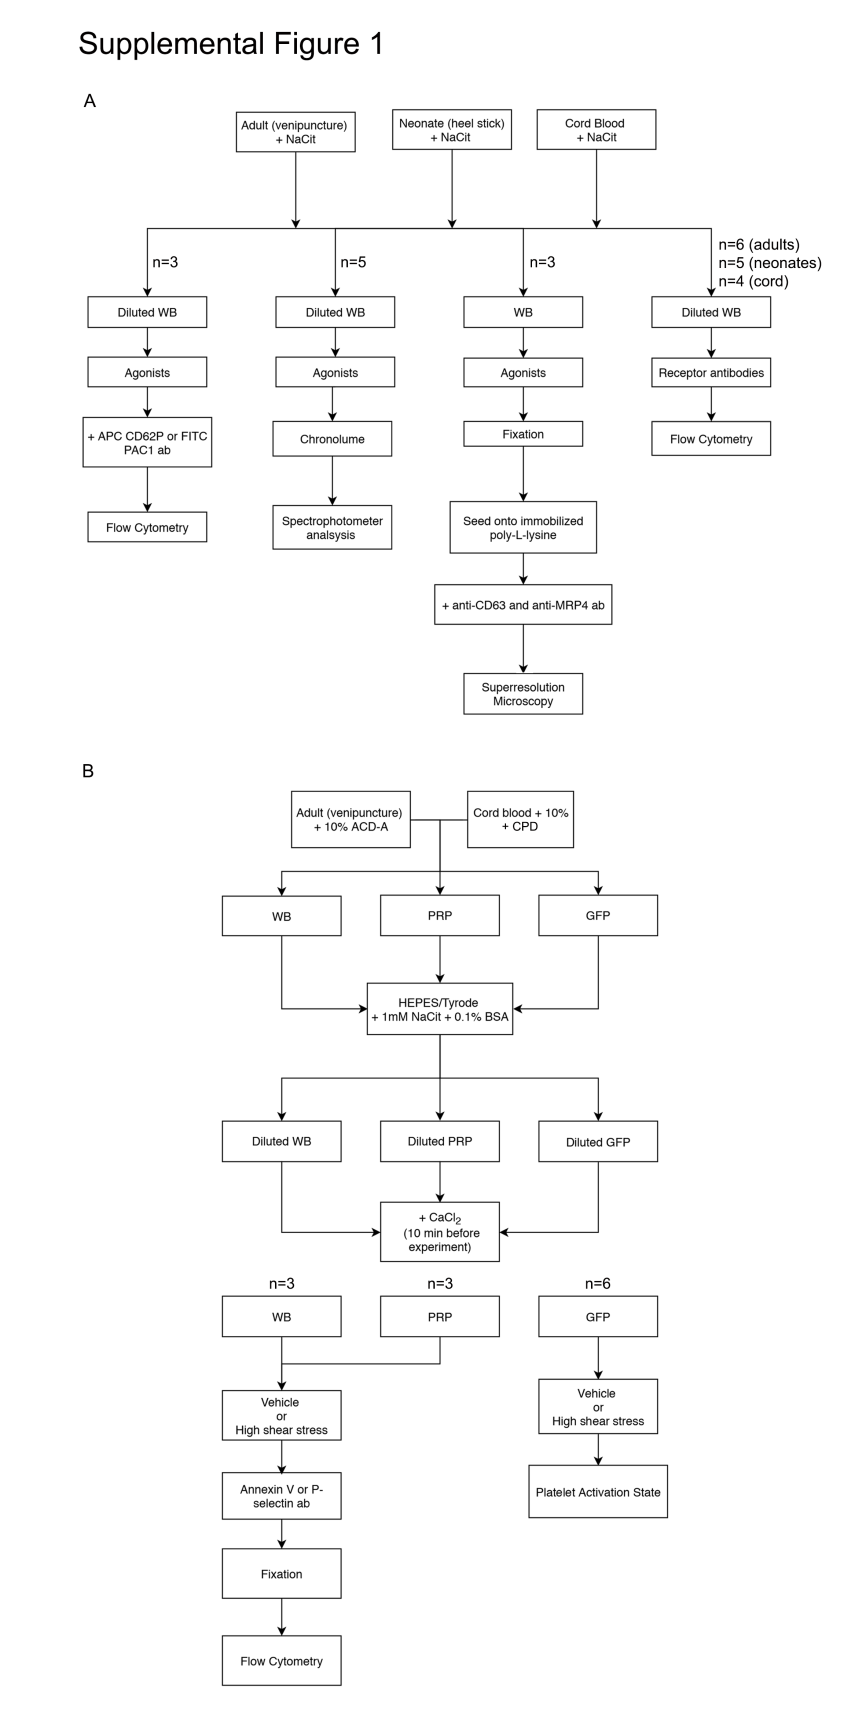

Supplement: Supplementary file 1 [file 14480144]
